# Supplementary material for: Integrating Baseline Nutritional and Inflammatory Parameters with Post-Treatment EBV DNA Level to Predict Outcomes of Patients with De Novo Metastatic Nasopharyngeal Carcinoma Receiving Chemotherapy Combination PD-1 Inhibitor
Source: MDPI journal article supplement (doi:10.3390/nu15194262), 2023-10-05
Supplement: s1 [file s1]

**Figure S1.** Flowchart showing the study design and patient selection process.

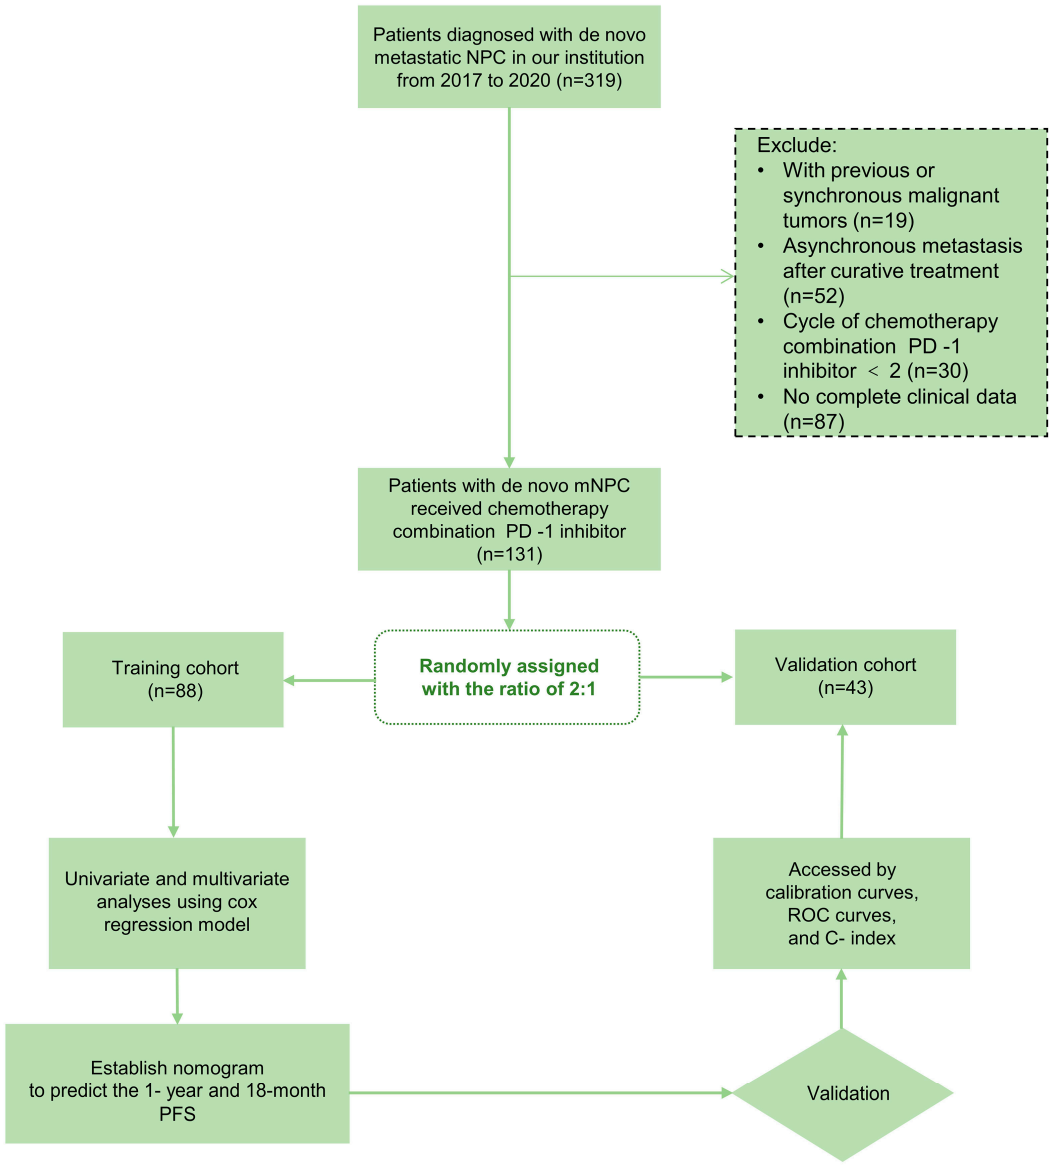

*Abbreviations:* mNPC, metastatic nasopharyngeal carcinoma; PD-1, programmed death-1; PFS, progression-free survival; ROC, receiver operating characteristic.

**Figure S2.** Cutoff of body mass index (BMI) determined by Maximally Selected Rank Statistics, and survival curves stratified by the cutoff.

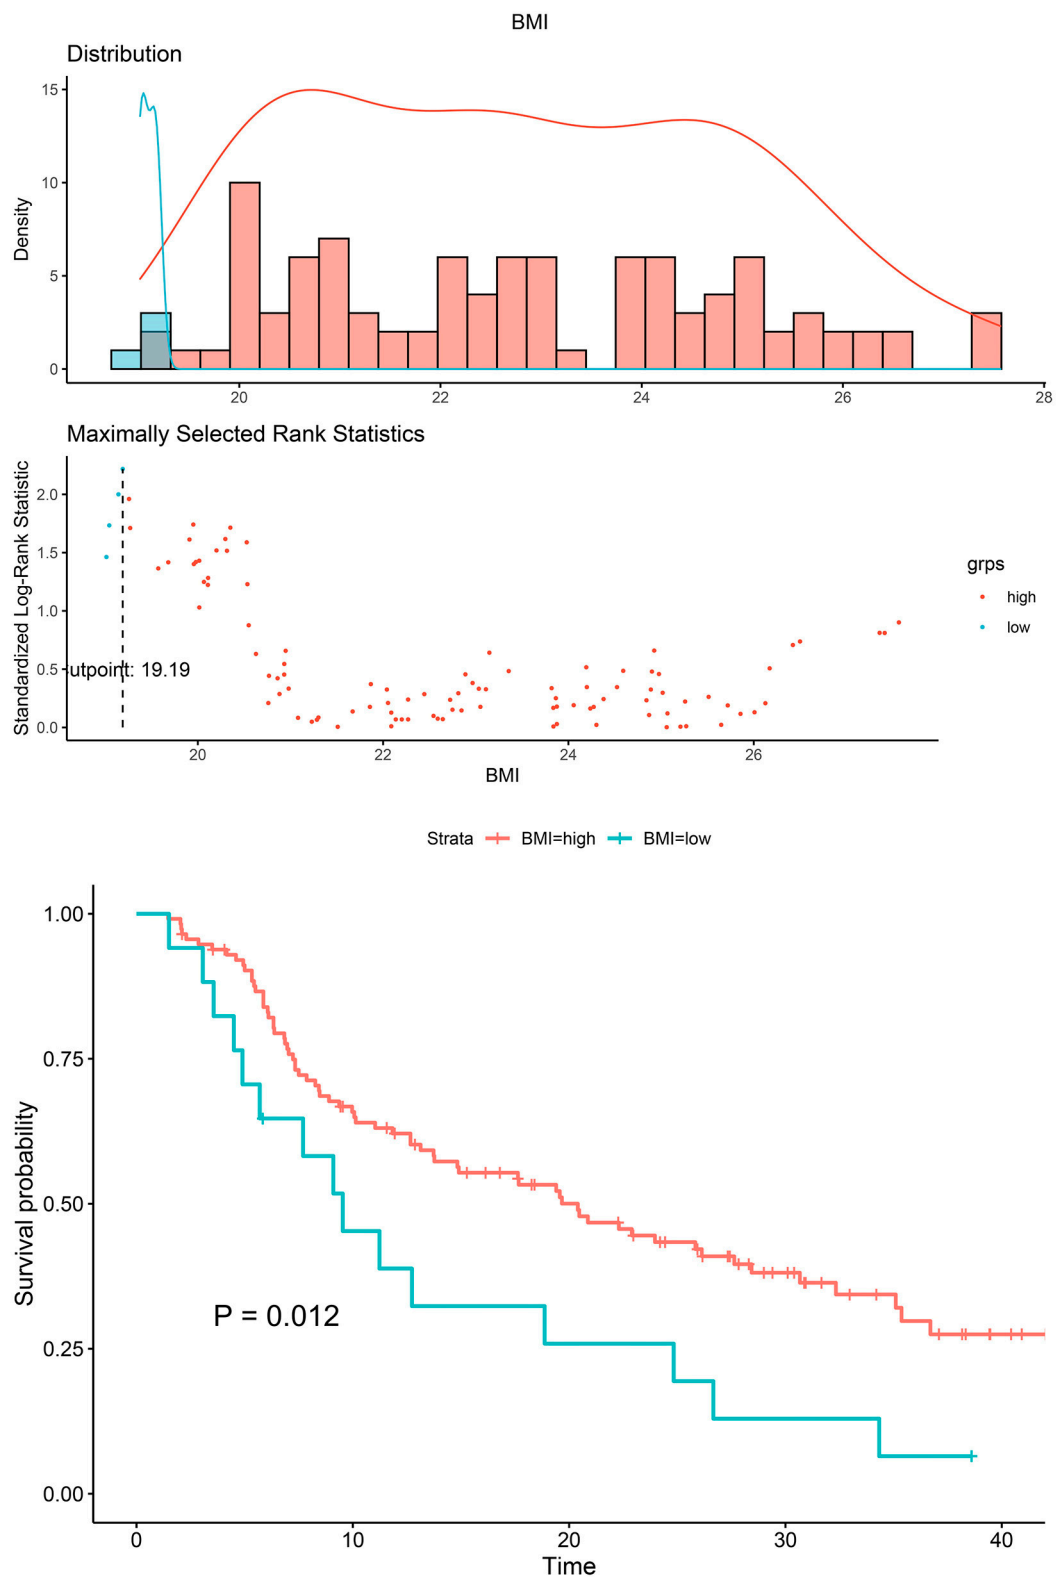

**Figure S3.** Cutoff of nutritional risk index (NRI) determined by Maximally Selected Rank Statistics, and survival curves stratified by the cutoff.

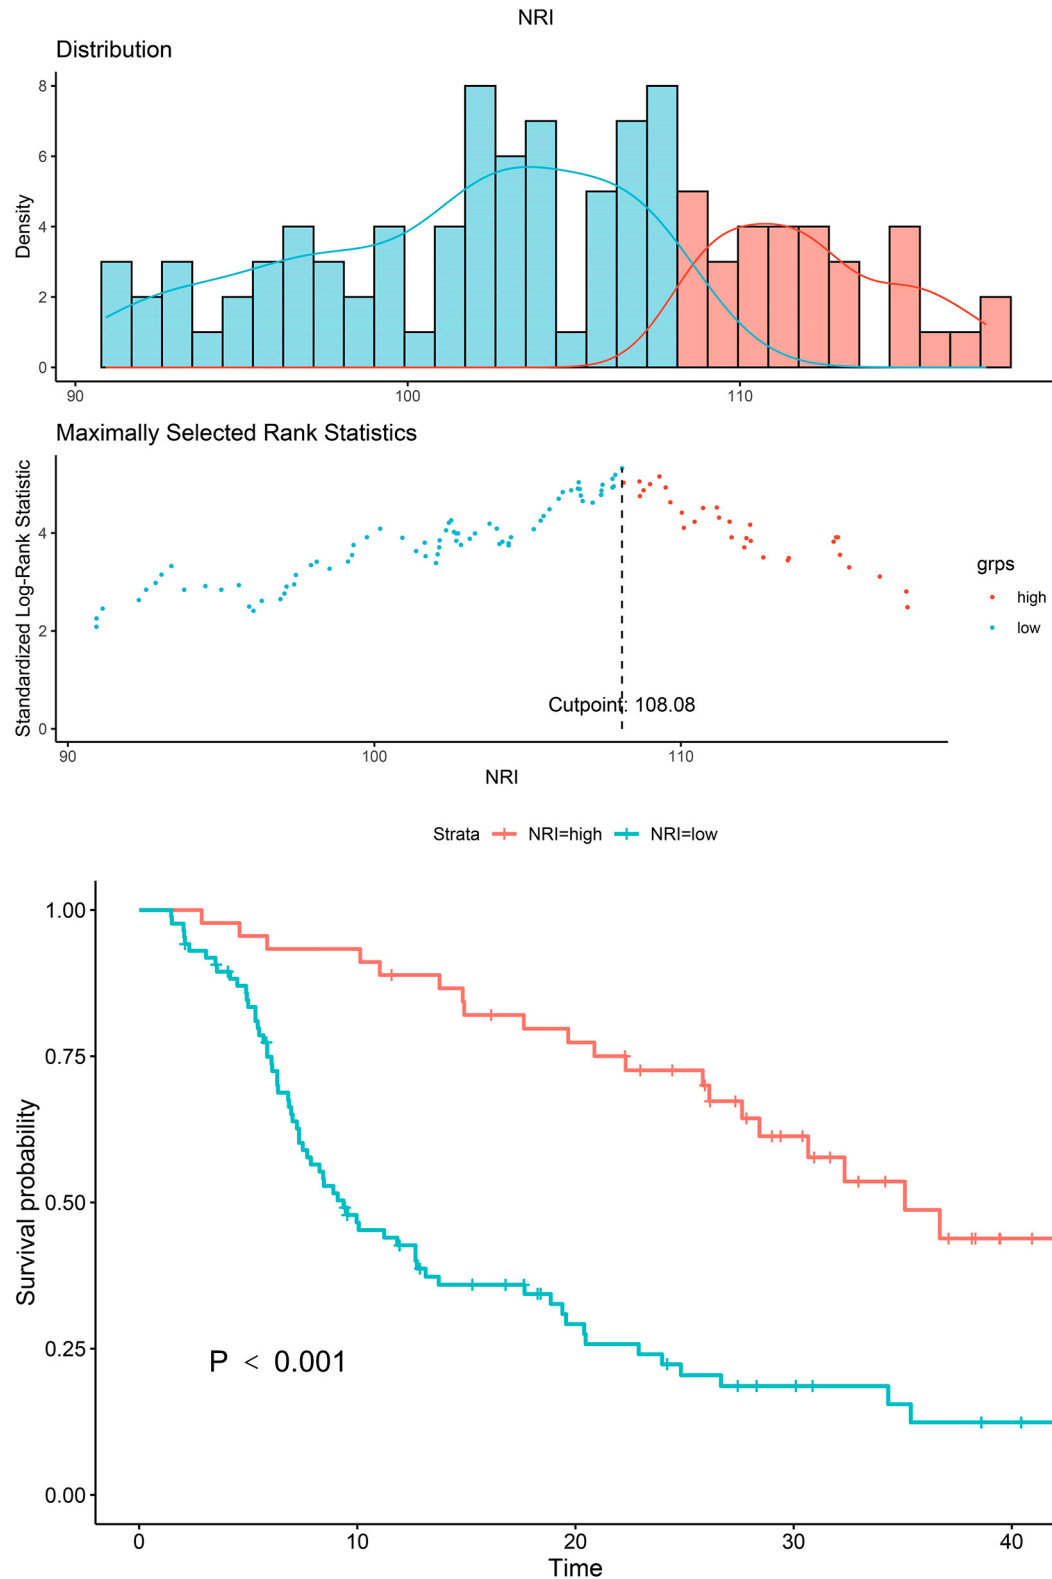

**Figure S4.** Cutoff of prognostic nutritional index (PNI) determined by Maximally Selected Rank Statistics, and survival curves stratified by the cutoff.

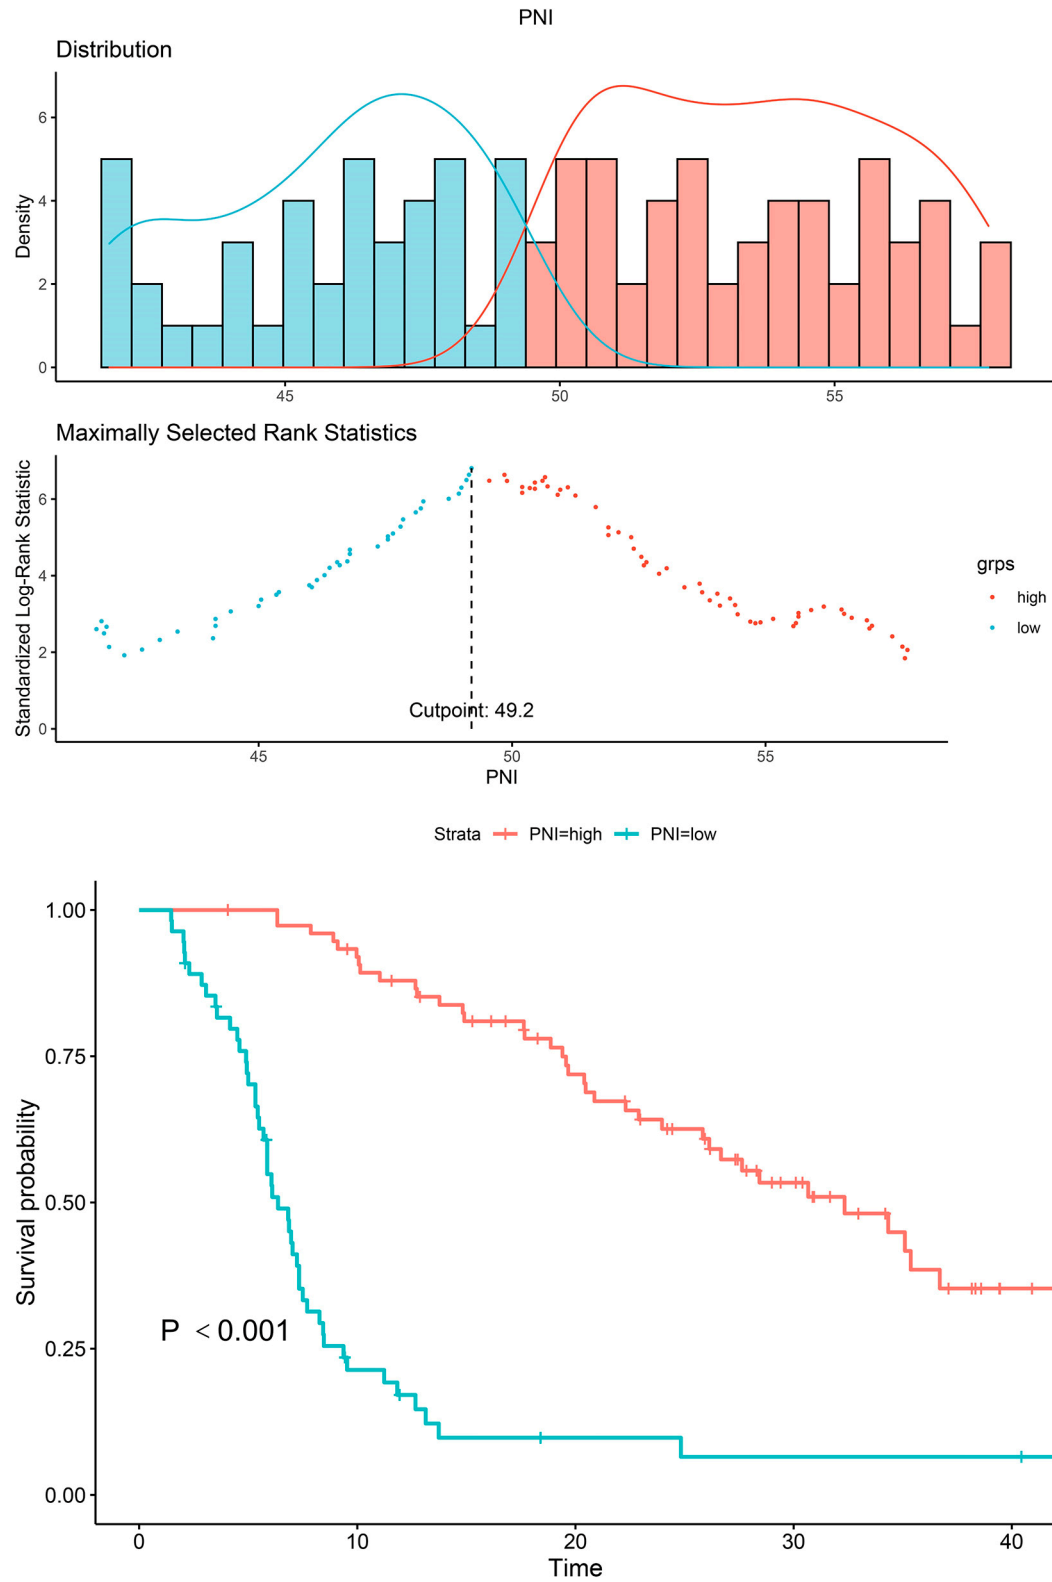

**Figure S5.** Cutoff of systemic immune-inflammation index (SII) determined by Maximally Selected Rank Statistics, and survival curves stratified by the cutoff.

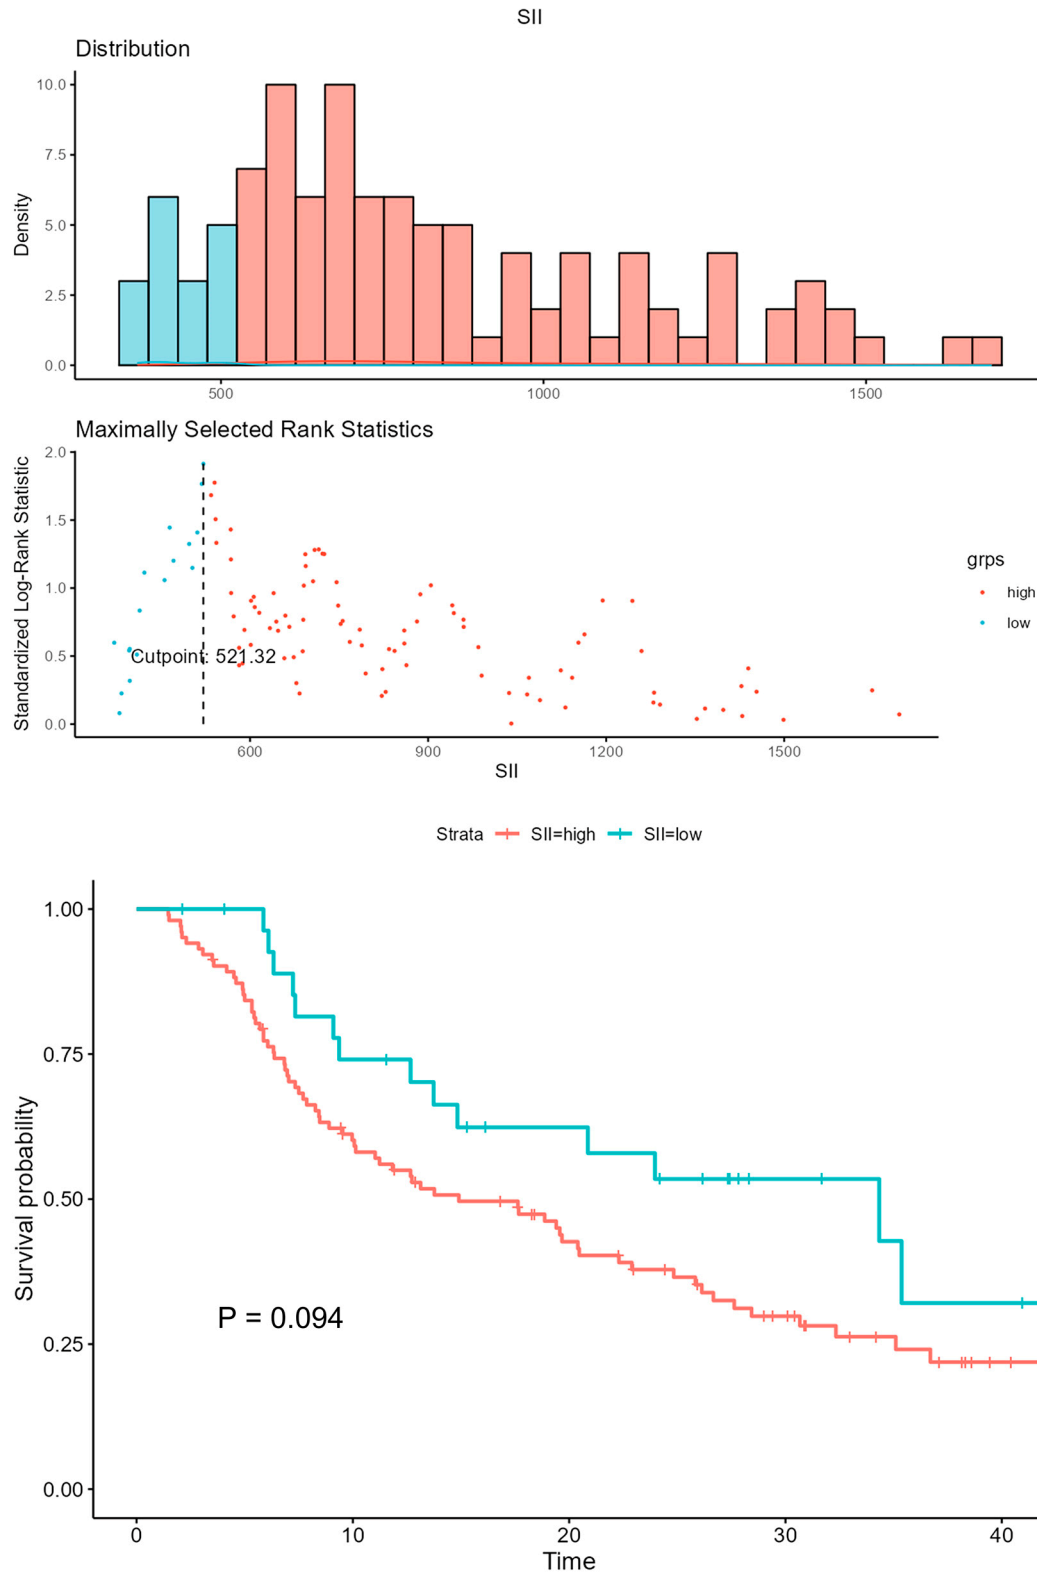

**Figure S6.** Cutoff of systemic inflammatory response index (SIRI) determined by Maxmally Selected Rank Statistics, and survival curves stratified by the cutoff.

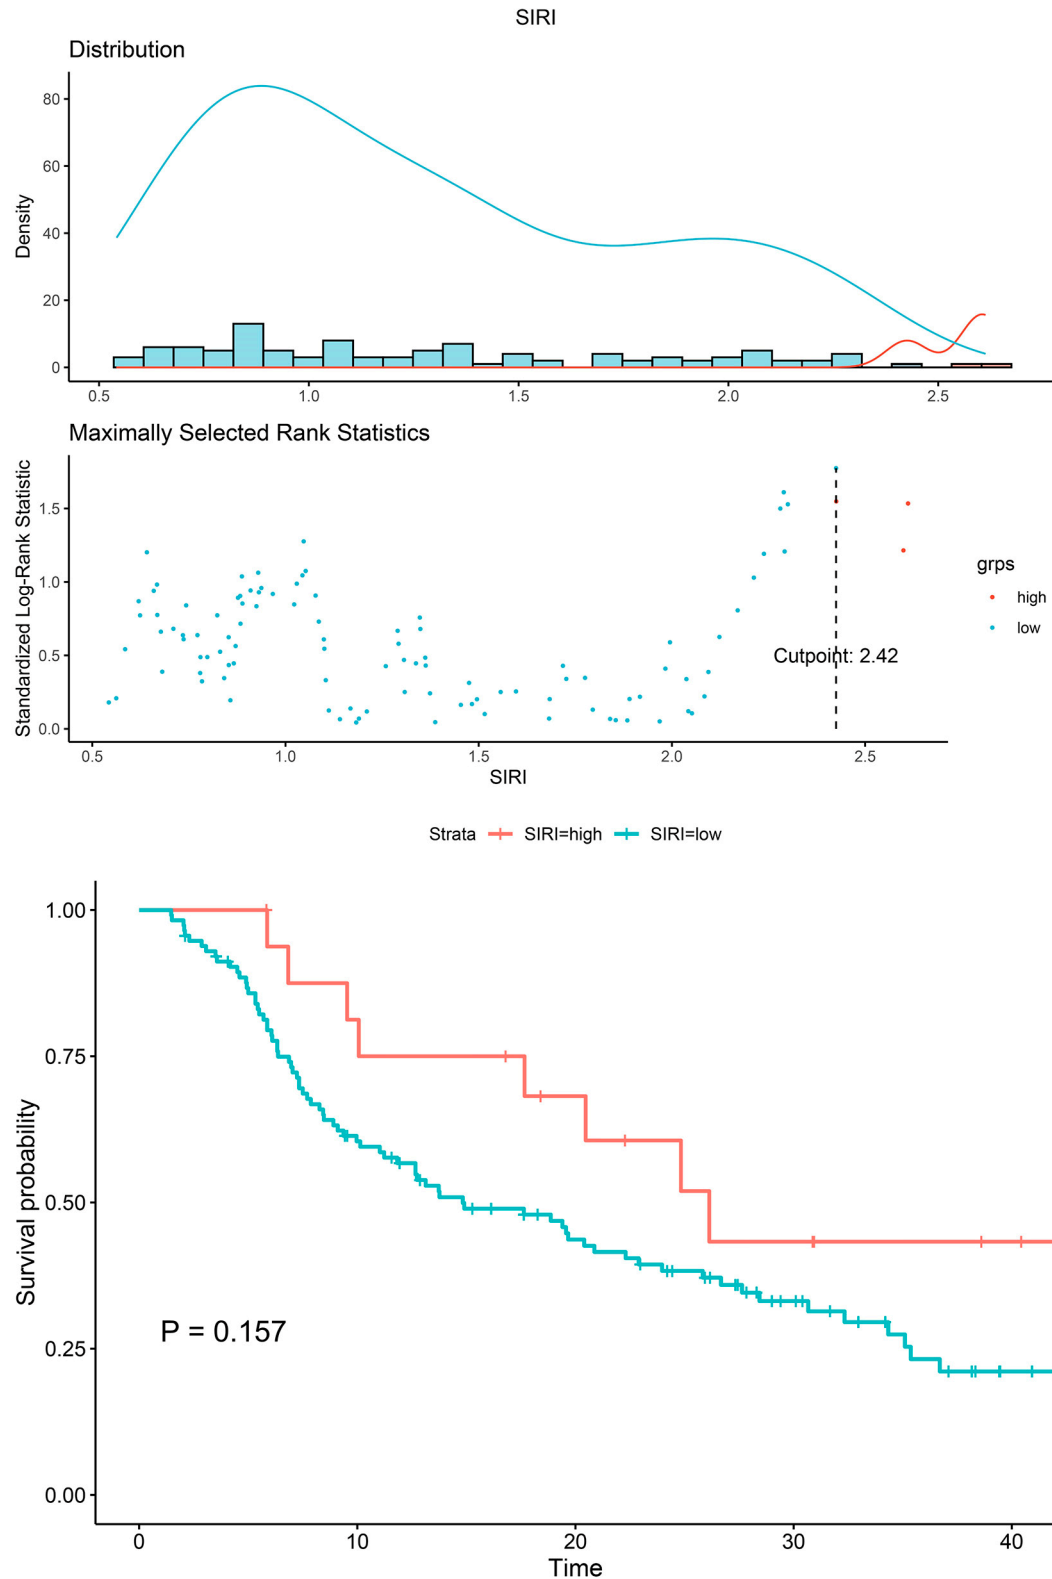

**Figure S7.** Cutoff of lactate dehydrogenase-to-albumin ratio (LAR) determined by Maximally Selected Rank Statistics, and survival curves stratified by the cutoff.

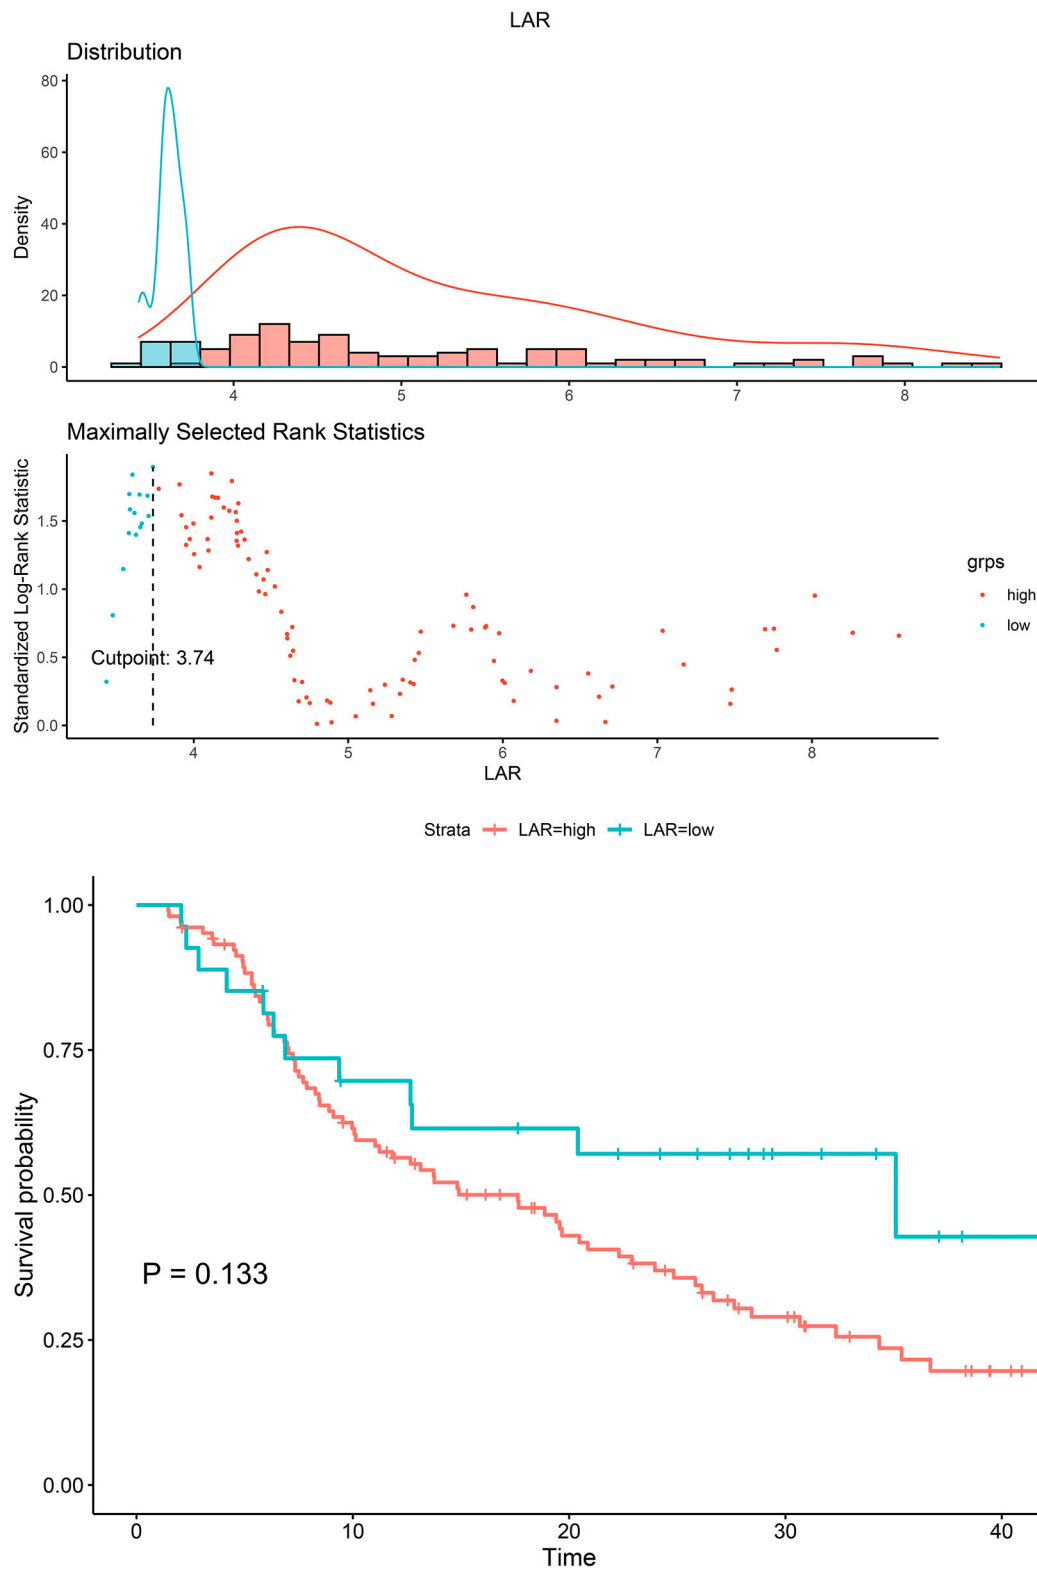

**Figure S8.** Cutoff of lymphocyte-to-monocyte ratio (LMR) determined by Maximally Selected Rank Statistics, and survival curves stratified by the cutoff.

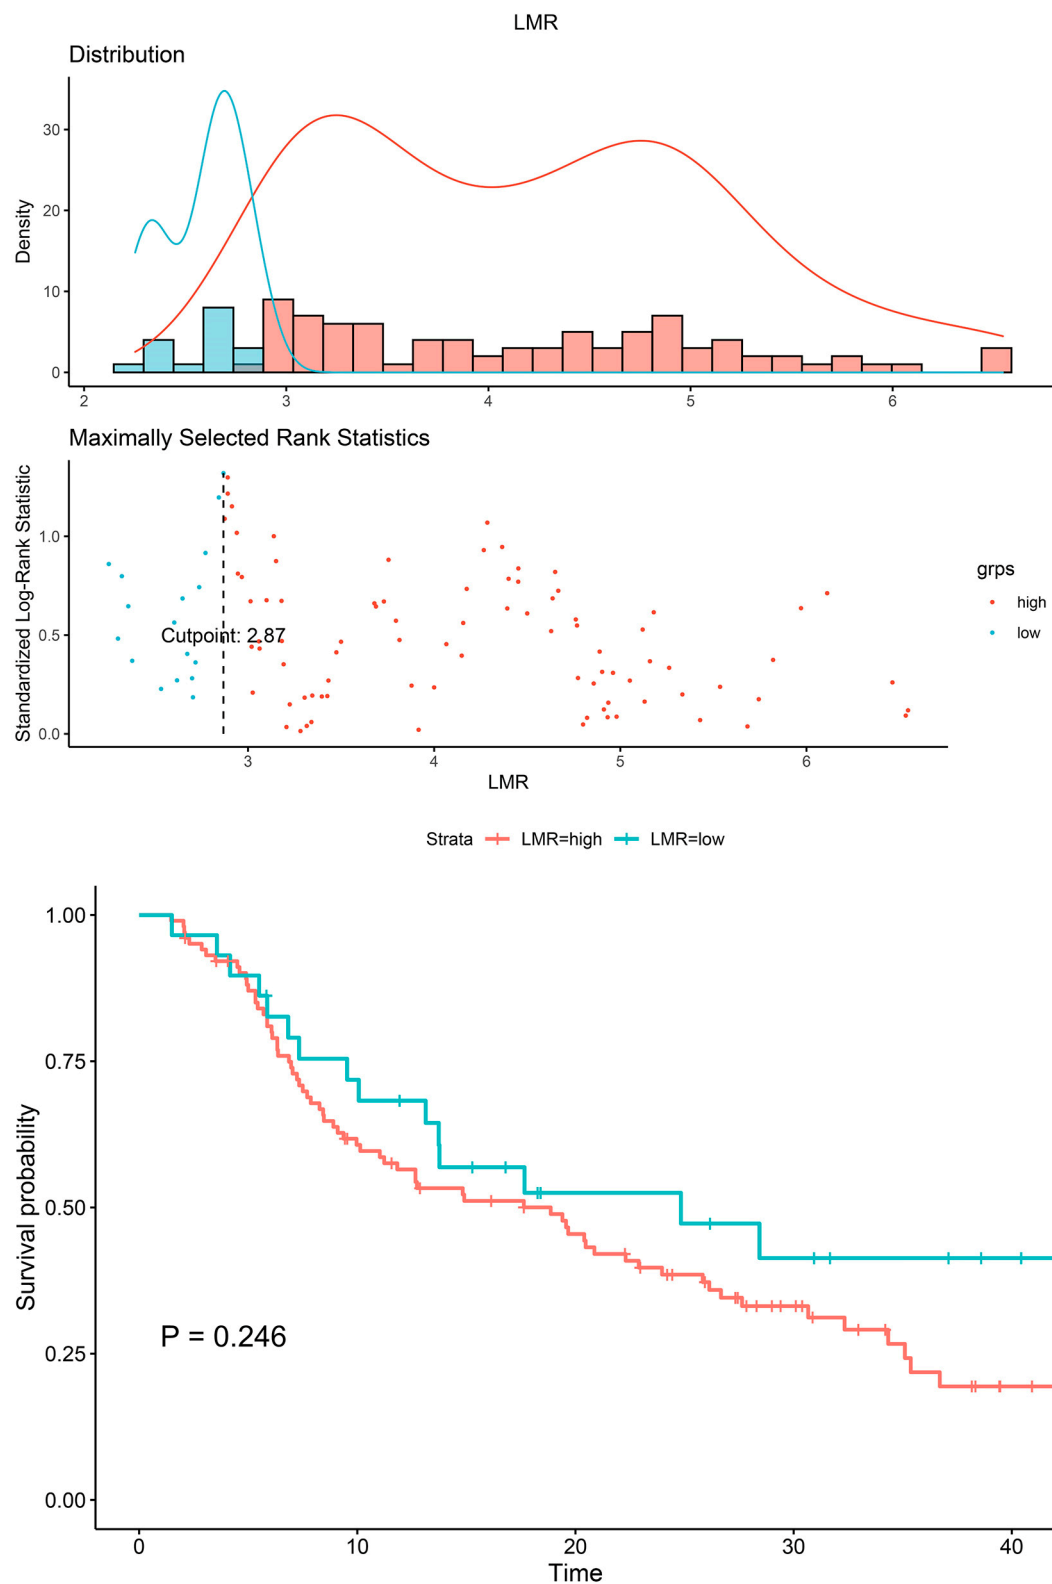

**Figure S9.** Cutoff of neutrophil-to-Lymphocyte ratio (NLR) determined by Maximally Selected Rank Statistics, and survival curves stratified by the cutoff.

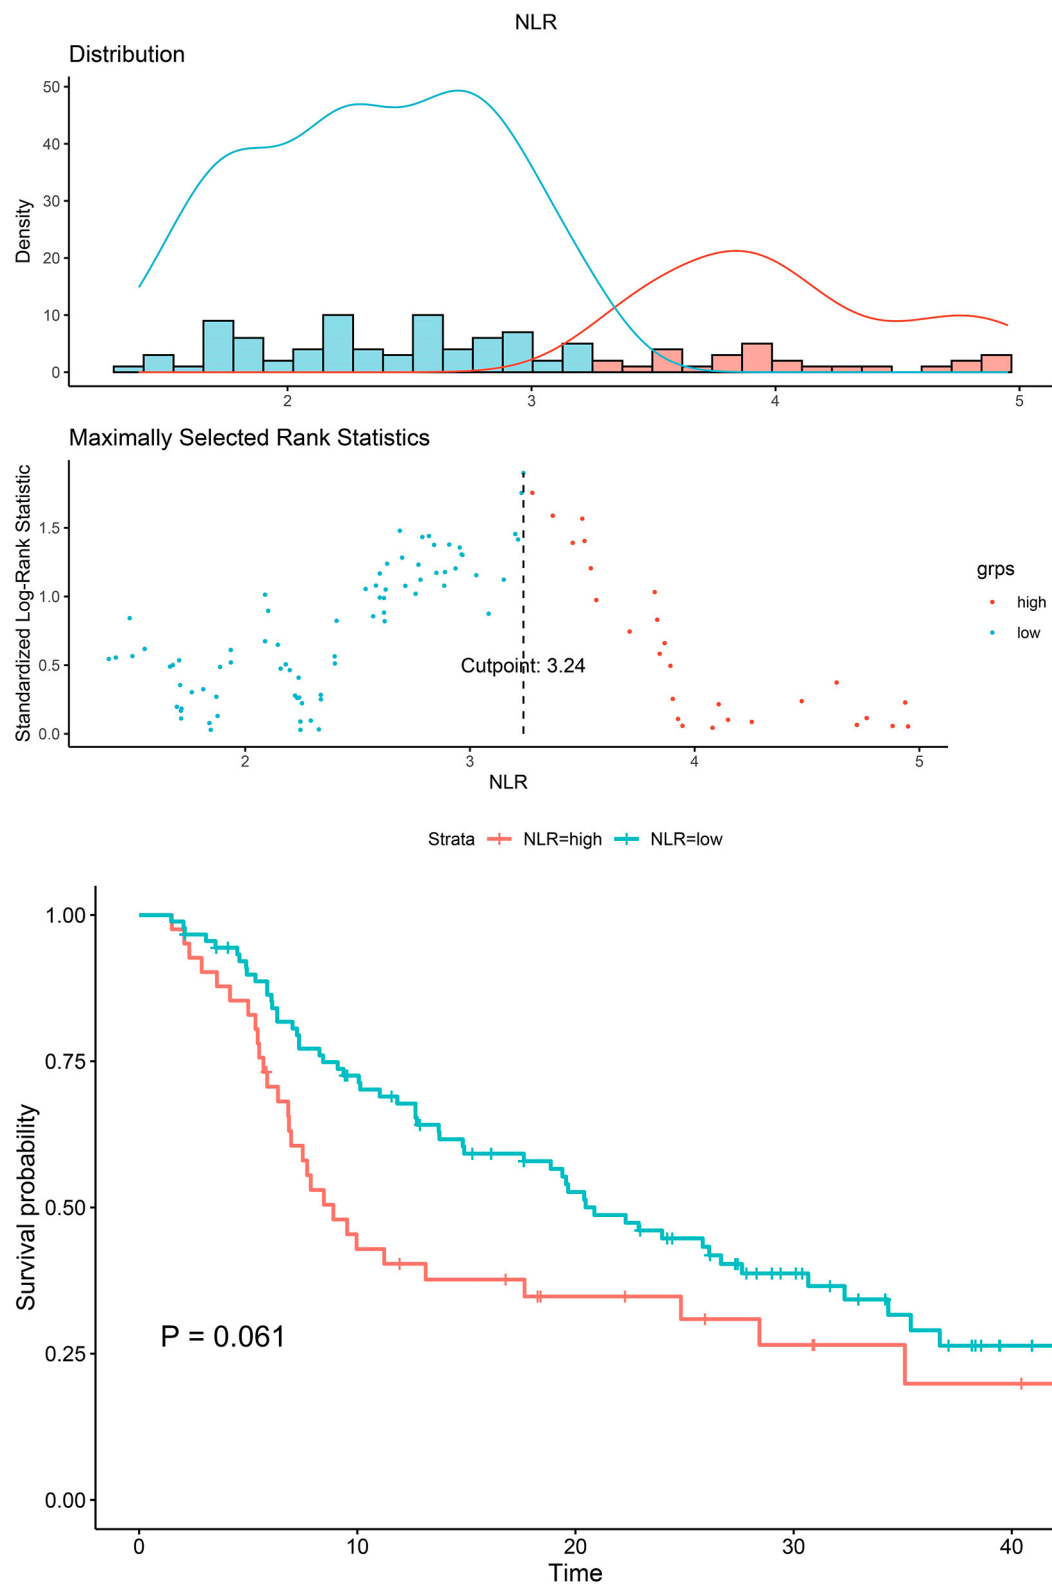

**Figure S10.** Cutoff of platelet-to-lymphocyte ratio (PLR) determined by Maximally Selected Rank Statistics, and survival curves stratified by the cutoff.

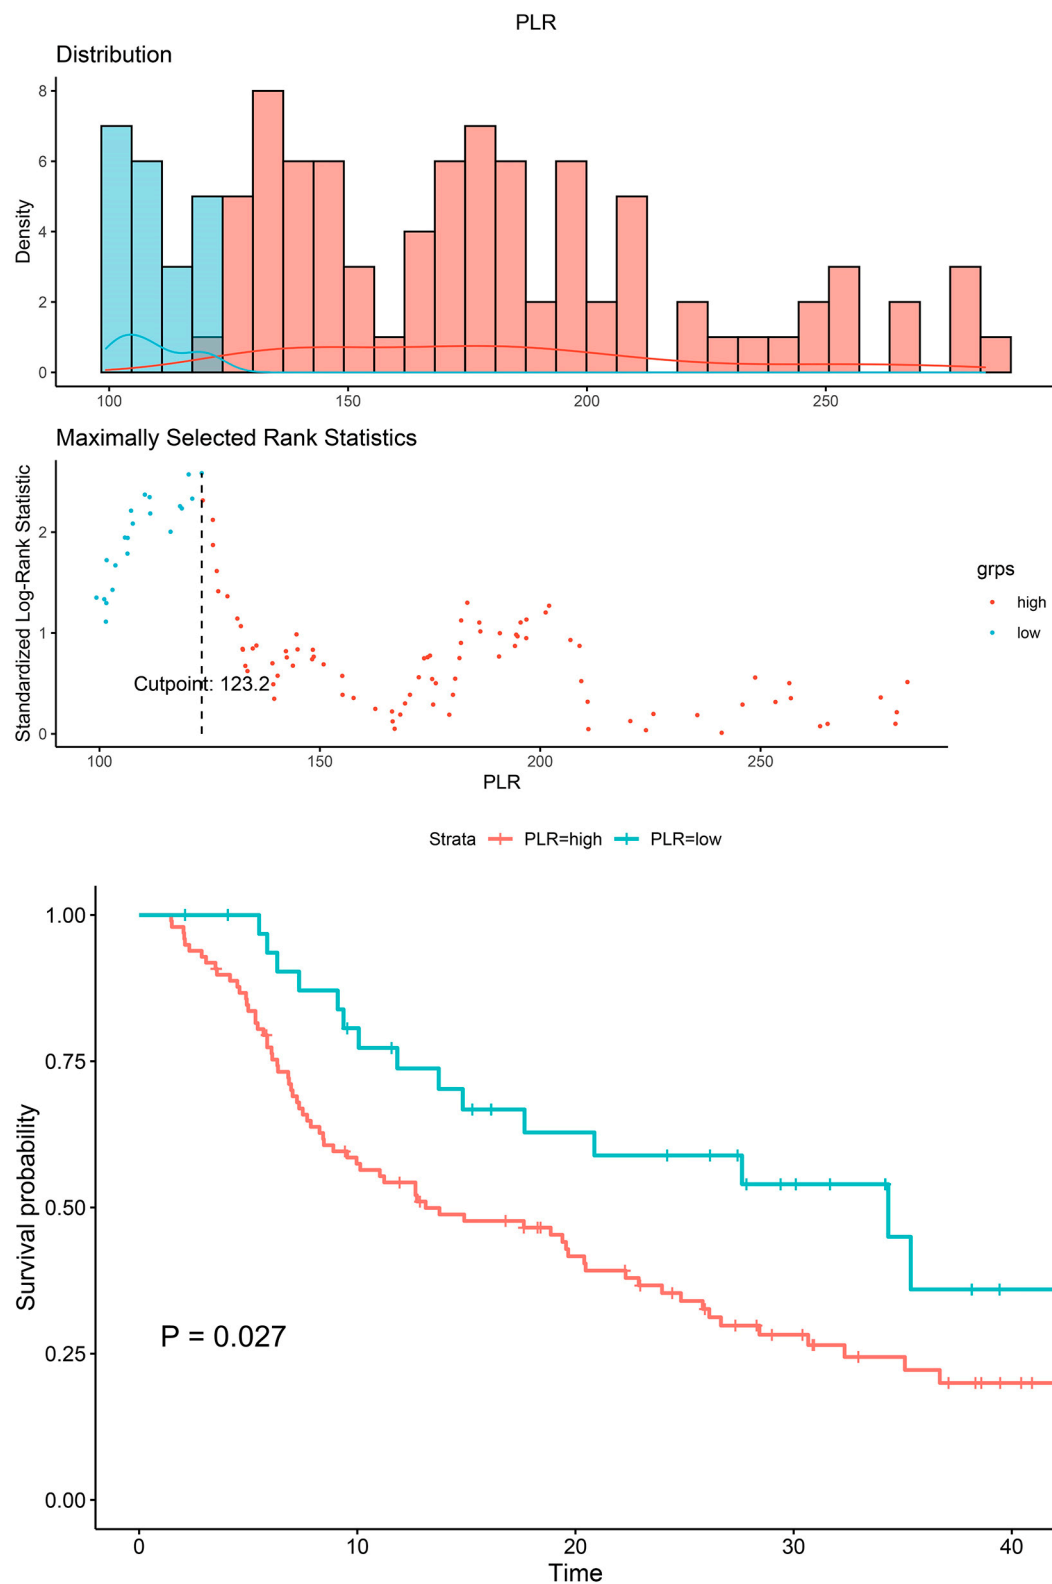

**Figure S11.** Cutoff of pretreatment Epstein-Barr virus DNA (EBV DNA) determined by Maximally Selected Rank Statistics, and survival curves stratified by the cutoff.

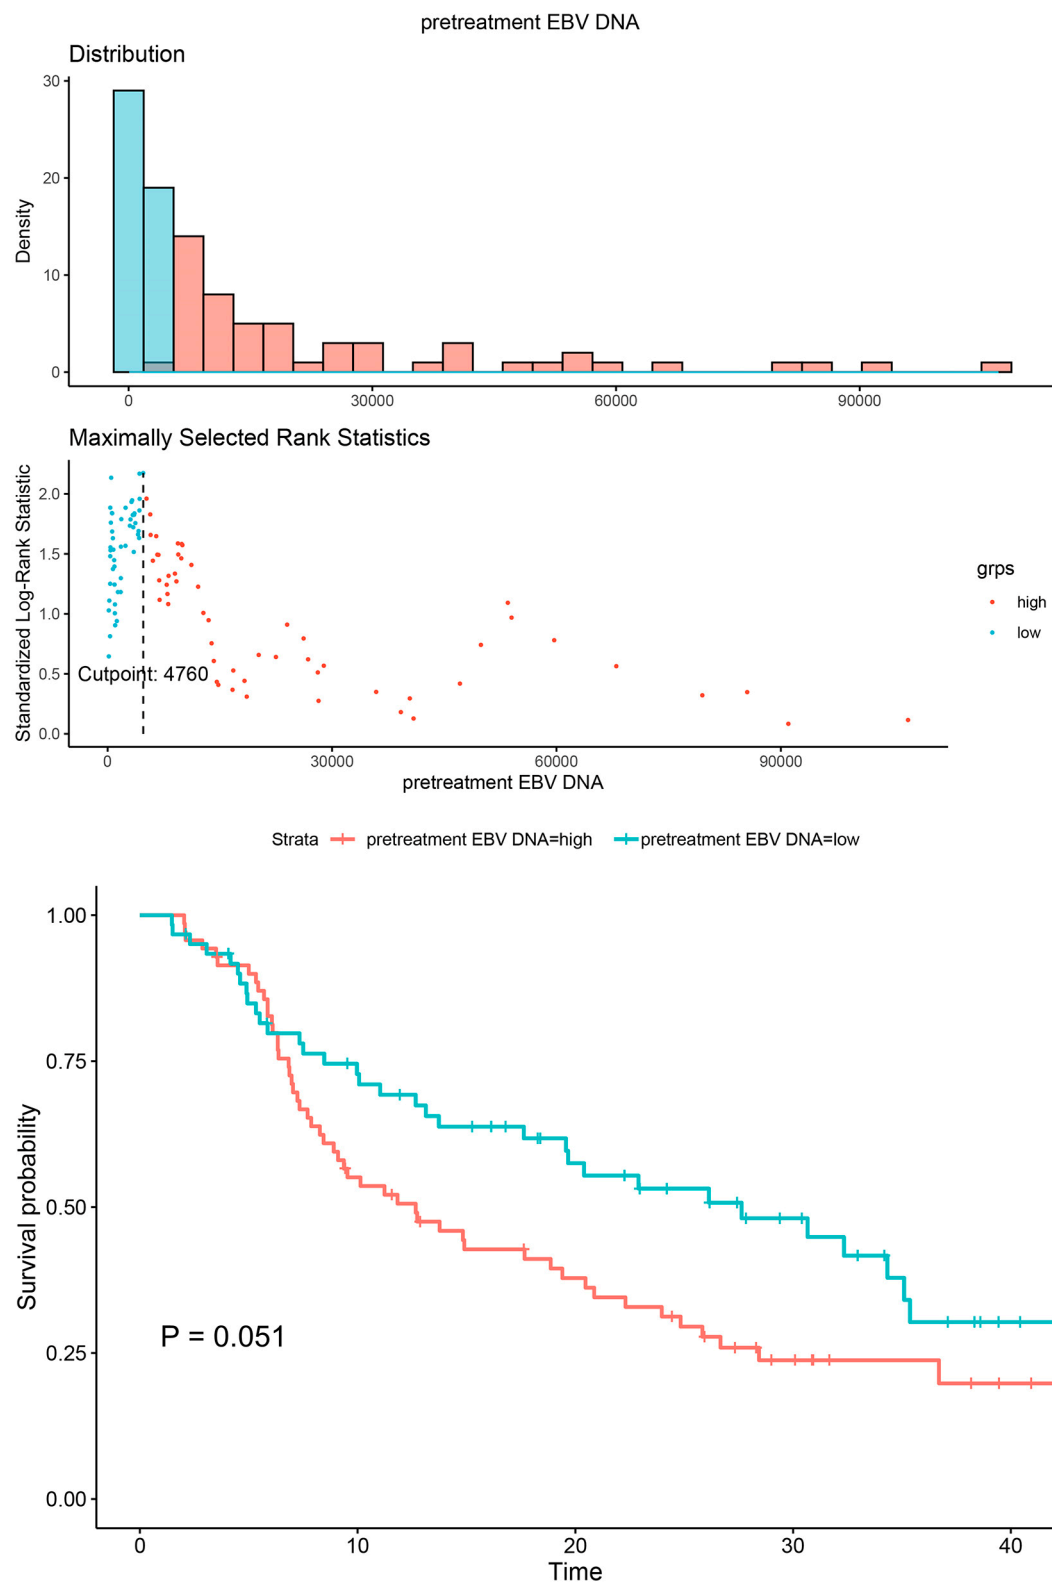

**Figure S12.** Cutoff of post-treatment Epstein-Barr virus DNA (EBV DNA) determined by Maximally Selected Rank Statistics, and survival curves stratified by the cutoff.

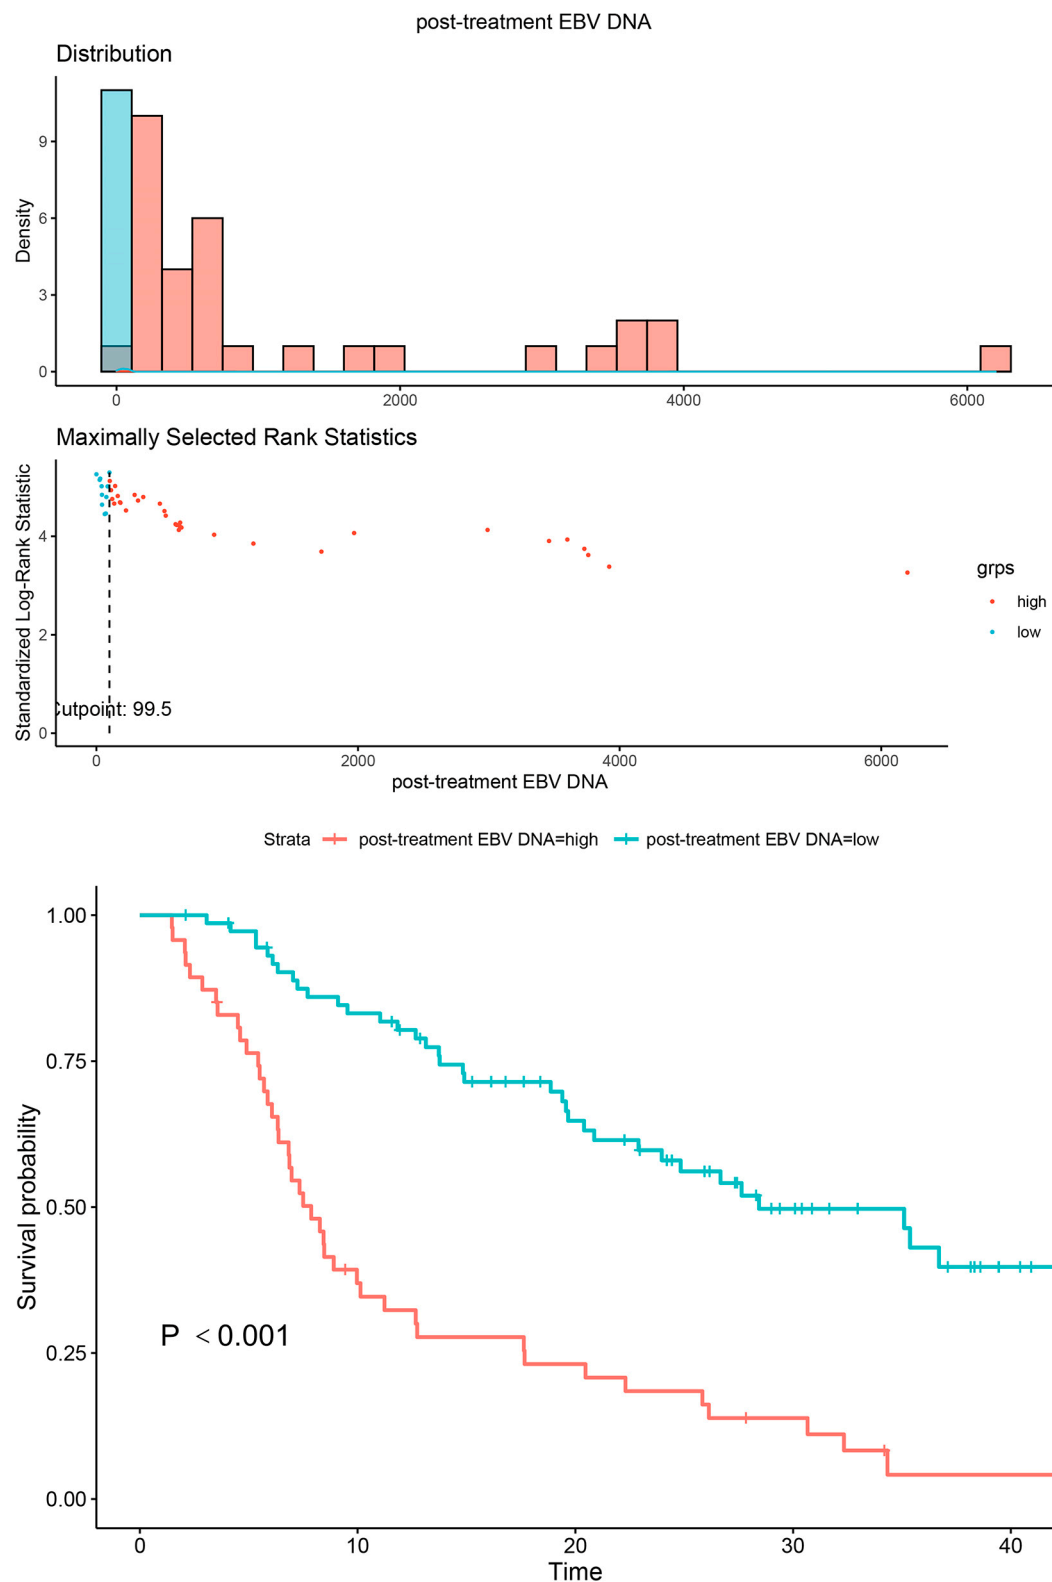

**Table S1.** Screening tool for Glasgow prognostic score.

| Parameter                 | Values    | Score |
|---------------------------|-----------|-------|
| C reactive protein (mg/L) | $\leq 10$ | 0     |

|               |     |   |
|---------------|-----|---|
|               | >10 | 1 |
| Albumin (g/L) | <35 | 1 |
|               | ≥35 | 0 |

**Table S2.** Screening tool for Controlling Nutritional Status score.

| Parameter                                   | Malnutrition status |           |           |        |
|---------------------------------------------|---------------------|-----------|-----------|--------|
|                                             | Normal              | Light     | Moderate  | Severe |
| Albumin (g/L)                               | ≥35.0               | 30.0-34.9 | 25.0-29.9 | < 25.0 |
| Score                                       | 0                   | 2         | 4         | 6      |
| Total lymphocyte count (10 <sup>9</sup> /L) | ≥1600               | 1200-1599 | 800-1199  | < 800  |
| Score                                       | 0                   | 1         | 2         | 3      |
| Total cholesterol (mmol/L)                  | ≥4.65               | 3.62-4.64 | 2.58-3.61 | <2.58  |
| Score                                       | 0                   | 1         | 2         | 3      |
| Total score                                 | 0-1                 | 2-4       | 5-8       | 9-12   |
